# Supplementary material for: Liquid–liquid extraction and separation of lead(ii) by using N-n-octylcyclohexylamine as an extractant: analysis of real samples
Source: Royal Society of Chemistry journal article supplement (doi:10.1039/c6ay00887a), 2016-01-01

**Liquid-liquid extraction and separation of lead(II) by using N-*n*-octylcyclohexylamine as  
an extractant : Analysis of real samples**

**Supplementary Information**

**Table 1. Extraction of lead(II) as a function of acid concentration**

| Acid,<br>M | HCl   |       | HNO <sub>3</sub> |       | H <sub>2</sub> SO <sub>4</sub> |      | HClO <sub>4</sub> |      | CH <sub>3</sub> COOH |      |
|------------|-------|-------|------------------|-------|--------------------------------|------|-------------------|------|----------------------|------|
|            | % E   | D     | % E              | D     | % E                            | D    | % E               | D    | % E                  | D    |
| 0.1        | 00    | 00    | 00               | 00    | 00                             | 00   | 00                | 00   | 00                   | 00   |
| 0.5        | 30.6  | 1.10  | 14.2             | 0.14  | 14.1                           | 0.41 | 18.8              | 0.57 | 17.0                 | 0.51 |
| 1.0        | 64.9  | 17.66 | 36.6             | 2.56  | 23.6                           | 0.77 | 32.6              | 1.20 | 29.0                 | 1.13 |
| 1.5        | 81.8  | 21.08 | 52.6             | 2.77  | 26.4                           | 0.88 | 31.7              | 1.16 | 34.2                 | 1.19 |
| 2.0        | 91.2  | 36.56 | 56.4             | 3.23  | 27.9                           | 1.24 | 27.4              | 0.94 | 36.0                 | 1.23 |
| 2.5        | 96.2  | 48.52 | 61.3             | 3.95  | 29.7                           | 1.05 | 26.0              | 0.87 | 37.8                 | 1.51 |
| 3.0        | 99.6  | 622.5 | 63.9             | 4.55  | 33.9                           | 1.28 | 26.2              | 0.98 | 43.0                 | 1.88 |
| 3.5        | 99.0  | 247.5 | 66.0             | 4.85  | 35.3                           | 1.35 | 23.9              | 0.78 | 44.1                 | 1.97 |
| 4.0        | 99.4* | 414.1 | 68.5             | 5.43  | 36.0                           | 1.40 | 21.0              | 0.66 | 43.3                 | 1.90 |
| 4.5        | 99.2  | 310.0 | 71.0             | 6.12  | 38.0                           | 1.53 | 20.4              | 0.64 | 42.5                 | 1.84 |
| 5.0        | 99.7  | 830.8 | 74.8             | 7.42  | 38.8                           | 1.58 | 19.8              | 0.61 | 42.1                 | 1.81 |
| 6.0        | 94.5  | 42.95 | 99.0             | 247.5 | 33.0                           | 1.23 | 16.4              | 0.49 | 34.0                 | 1.28 |
| 7.0        | 80.0  | 10.0  | 99.7             | 830.8 | 30.9                           | 1.11 | 18.2              | 0.54 | 32.4                 | 1.19 |
| 8.0        | 61.5  | 3.99  | 98.2             | 136.4 | 23.6                           | 0.76 | 16.8              | 0.50 | 27.9                 | 1.24 |
| 9.0        | 57.2  | 3.34  | 63.3             | 4.56  | 18.8                           | 0.57 | 13.6              | 0.39 | 26.7                 | 0.91 |
| 10         | 49.0  | 2.40  | 44.5             | 2.44  | 18.5                           | 0.56 | 11.2              | 0.31 | 23.6                 | 0.77 |

\*Acid concentration recommended for extraction procedure

Pb(II) = 100 µg, N-*n*-OCA = 0.04M in xylene, Equilibrium time= 3 min, Aqueous: organic  
volume ratio = 2.5:1, Strippant = 0.5M HNO<sub>3</sub> (3x10mL)

**Table 2. Influence of amine concentration on extraction of lead(II)**

| <b>N-<i>n</i>-octylcyclohexylamine, M</b> | <b>Percentage extraction, (%E)</b> | <b>Distribution Ratio, (D)</b> |
|-------------------------------------------|------------------------------------|--------------------------------|
| 0.001                                     | 9.12                               | 0.64                           |
| 0.002                                     | 16.6                               | 0.67                           |
| 0.003                                     | 21.2                               | 0.76                           |
| 0.004                                     | 24.8                               | 0.82                           |
| 0.005                                     | 27.9                               | 0.96                           |
| 0.006                                     | 31.4                               | 0.98                           |
| 0.007                                     | 35.6                               | 1.05                           |
| 0.008                                     | 39.2                               | 1.11                           |
| 0.009                                     | 43.8                               | 1.14                           |
| 0.01                                      | 47.6                               | 1.18                           |
| 0.015                                     | 64.2                               | 2.98                           |
| 0.02                                      | 78.8                               | 9.29                           |
| 0.025                                     | 98.0                               | 224.77                         |
| 0.03                                      | 99.4                               | 247.50                         |
| 0.035                                     | 99.5                               | 224.77                         |
| 0.04*                                     | 99.4                               | 310.00                         |
| 0.045                                     | 99.6                               | 622.50                         |
| 0.05                                      | 99.1                               | 164.16                         |
| 0.055                                     | 99.0                               | 176.07                         |
| 0.06                                      | 93.4                               | 21.77                          |
| 0.07                                      | 81.3                               | 12.20                          |
| 0.08                                      | 68.5                               | 4.985                          |
| 0.09                                      | 59.4                               | 3.65                           |
| 0.1                                       | 54.5                               | 2.99                           |

\*recommended for extraction procedure

Pb(II) = 100 µg, Hydrochloric acid = 4 M, Equilibrium time= 3 min, Aqueous: organic volume ratio = 2.5:1, Strippant = 0.5M HNO<sub>3</sub> (3x10mL), Solvent= xylene

**Table 3. Effect of shaking time on N-*n*-OCA**

| <b>Time,<br/>min</b> | <b>Percentage extraction,<br/>%E</b> | <b>Distribution ratio,<br/>D</b> |
|----------------------|--------------------------------------|----------------------------------|
| 0.25                 | 6.3                                  | 0.16                             |
| 0.5                  | 12.7                                 | 0.36                             |
| 0.75                 | 27.3                                 | 0.93                             |
| 1                    | 53.9                                 | 2.92                             |
| 2                    | 82.4                                 | 11.70                            |
| 3*                   | 99.1                                 | 275.27                           |
| 4                    | 99.7                                 | 830.83                           |
| 5                    | 99.0                                 | 247.50                           |
| 6                    | 99.2                                 | 310.00                           |
| 7                    | 98.5                                 | 42.95                            |
| 8                    | 95.8                                 | 21.72                            |
| 9                    | 92.1                                 | 13.32                            |
| 10                   | 88.6                                 | 8.36                             |
| 15                   | 84.3                                 | 6.86                             |
| 30                   | 82.6                                 | 6.65                             |

\* recommended for extraction procedure

Pb(II) = 100 µg, Hydrochloric acid = 4 M, Aqueous: organic volume ratio = 2.5:1, Strippant = 0.5M HNO<sub>3</sub> (3x10mL), Solvent= xylene, N-*n*-OCA = 0.04M in xylene

**Table 4. Extraction of lead(II) as an aqueous: organic volume ratio with N-*n*-OCA**

| <b>Volume of aqueous phase, mL</b> | <b>Volume of organic phase, mL</b> | <b>Aqueous to organic volume ratio</b> | <b>Percentage extraction, (%E)</b> | <b>Distribution ratio, D</b> |
|------------------------------------|------------------------------------|----------------------------------------|------------------------------------|------------------------------|
| 10                                 | 10                                 | 1:1                                    | 99.2                               | 310.00                       |
| 20                                 | 10                                 | 2:1                                    | 99.0                               | 247.50                       |
| 25*                                | 10                                 | 2.5:1                                  | 99.5                               | 497.5                        |
| 50                                 | 10                                 | 5:1                                    | 99.3                               | 354.64                       |
| 60                                 | 10                                 | 6:1                                    | 99.1                               | 275.27                       |
| 75                                 | 10                                 | 7.5:1                                  | 82.1                               | 11.46                        |
| 100                                | 10                                 | 10:1                                   | 74.8                               | 7.42                         |
| 125                                | 10                                 | 12.5:1                                 | 69.7                               | 5.75                         |
| 150                                | 10                                 | 15:1                                   | 53.9                               | 2.92                         |
| 200                                | 10                                 | 20:1                                   | 36.3                               | 1.42                         |
| 250                                | 10                                 | 25:1                                   | 31.4                               | 1.14                         |

\* recommended for extraction procedure.

Pb(II) = 100 µg, Hydrochloric acid = 4 M, N-*n*-OCA = 0.04M in xylene, Equilibrium time= 3 min, Strippant = 0.5 M HNO<sub>3</sub> (3x10mL)

**Table 5. Loading capacity of lead(II) on N-*n*-octylcyclohexylamine**

| <b>Pb(II) in<br/>μg</b> | <b>Percentage extraction ,<br/>(% E)</b> | <b>Distribution ratio,<br/>(D)</b> |
|-------------------------|------------------------------------------|------------------------------------|
| 50                      | 99.4                                     | 414.16                             |
| 100*                    | 99.6                                     | 622.50                             |
| 150                     | 98.8                                     | 205.83                             |
| 200                     | 99.0                                     | 247.50                             |
| 250                     | 99.2                                     | 310.00                             |
| 300                     | 98.9                                     | 224.77                             |
| 350                     | 81.4                                     | 10.91                              |
| 400                     | 69.6                                     | 5.72                               |
| 500                     | 57.1                                     | 3.32                               |
| 600                     | 51.4                                     | 2.64                               |
| 700                     | 46.7                                     | 2.19                               |
| 800                     | 44.9                                     | 2.03                               |
| 900                     | 37.0                                     | 1.46                               |
| 1000                    | 35.6                                     | 1.38                               |

\*Pb(II) recommended for extraction procedure

Hydrochloric acid = 4 M, N-*n*-OCA = 0.04M in xylene, Equilibrium time= 3 min, Strippant = 0.5M HNO<sub>3</sub> (3x10mL), Diluent = xylene, Aqueous: organic volume ratio = 2.5:1

## Supplementary Information

### Supplimentary information of figure captions

**Fig 1.** TLC

**Fig 2.** NMR Spectrum of N-*n*-octylcyclohexylamine

**Fig 3.** GC- MS data of the N-*n*-octylcyclohexylamine

**Fig 4.** UV-VIS Spetra

**Fig 5.** Effect of solvent

Figures:

Fig. 1

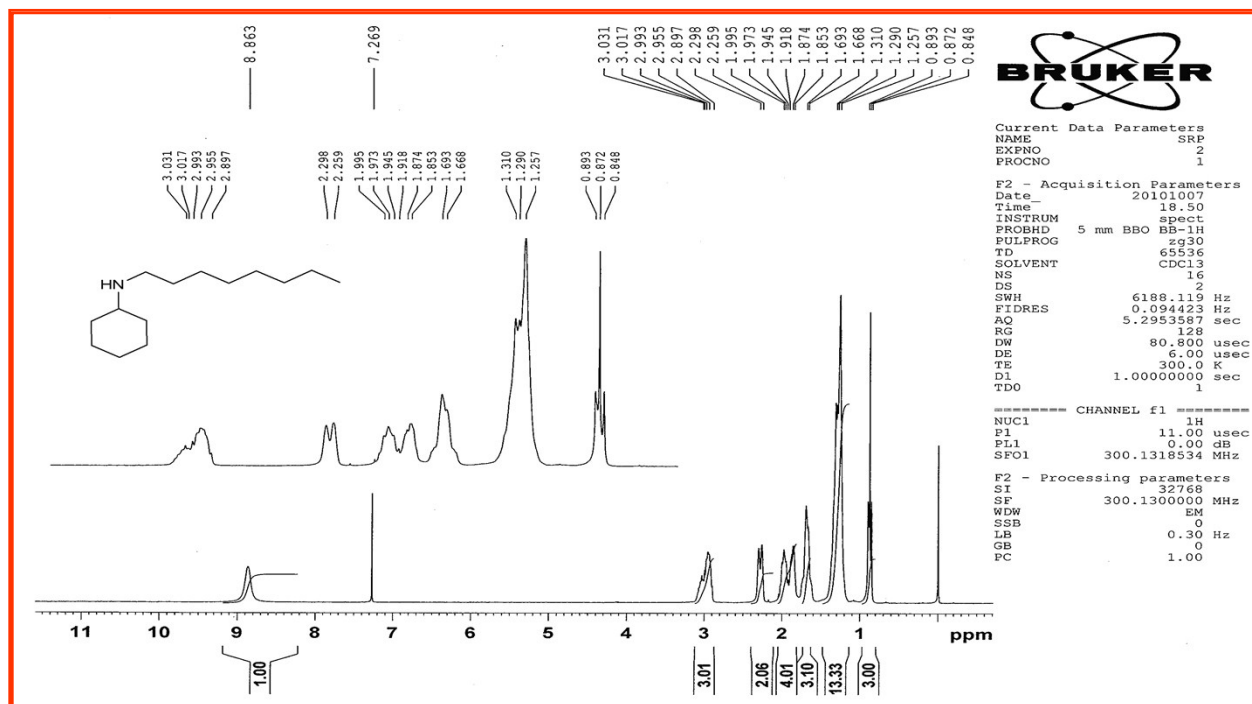

NMR Spectrum of N-*n*-octylcyclohexylamine.

The  $^1\text{H}$  NMR spectrum of N-*n*-octylcyclohexylamine exhibited a triplet at  $\delta$  0.893 due to methyl proton of *n*-octyl side chain. The singlet appeared at  $\delta$  8.86 confirmed the presence of -NH proton. The presence of twelve methylene group protons appeared as multiplet in the range of  $\delta$  1.25 - 3.03.

**Fig. 2**

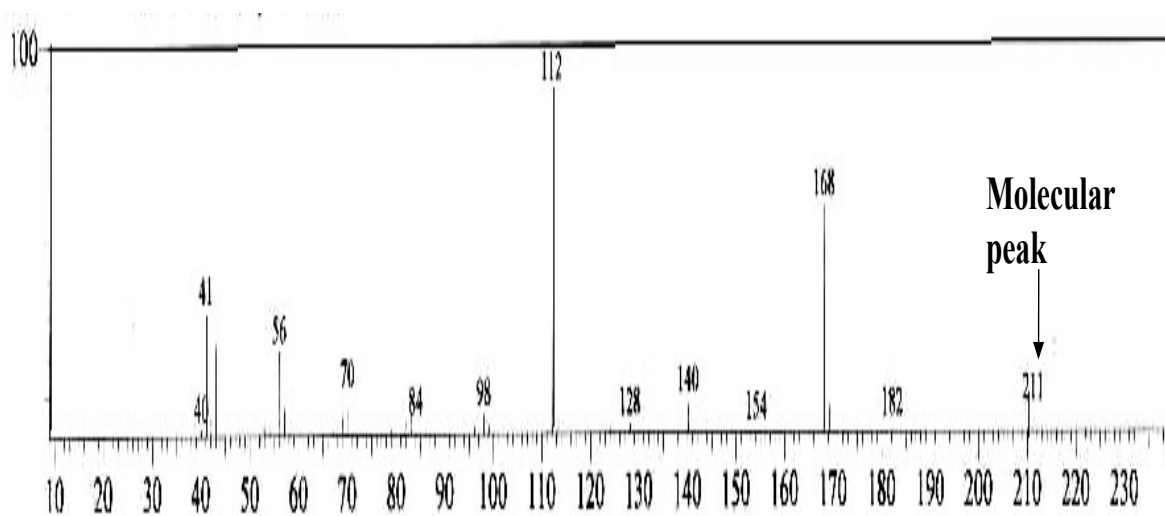

**GC- MS data of the N-*n*-octylcyclohexylamine**

Finally the structure of the reagent was confirmed by GC-MS analysis which is in good agreement with the proposed structure. Molecular peak at 211 clearly shows that formation of desired product by condensation reaction at room temperature.



**Fig. 3**

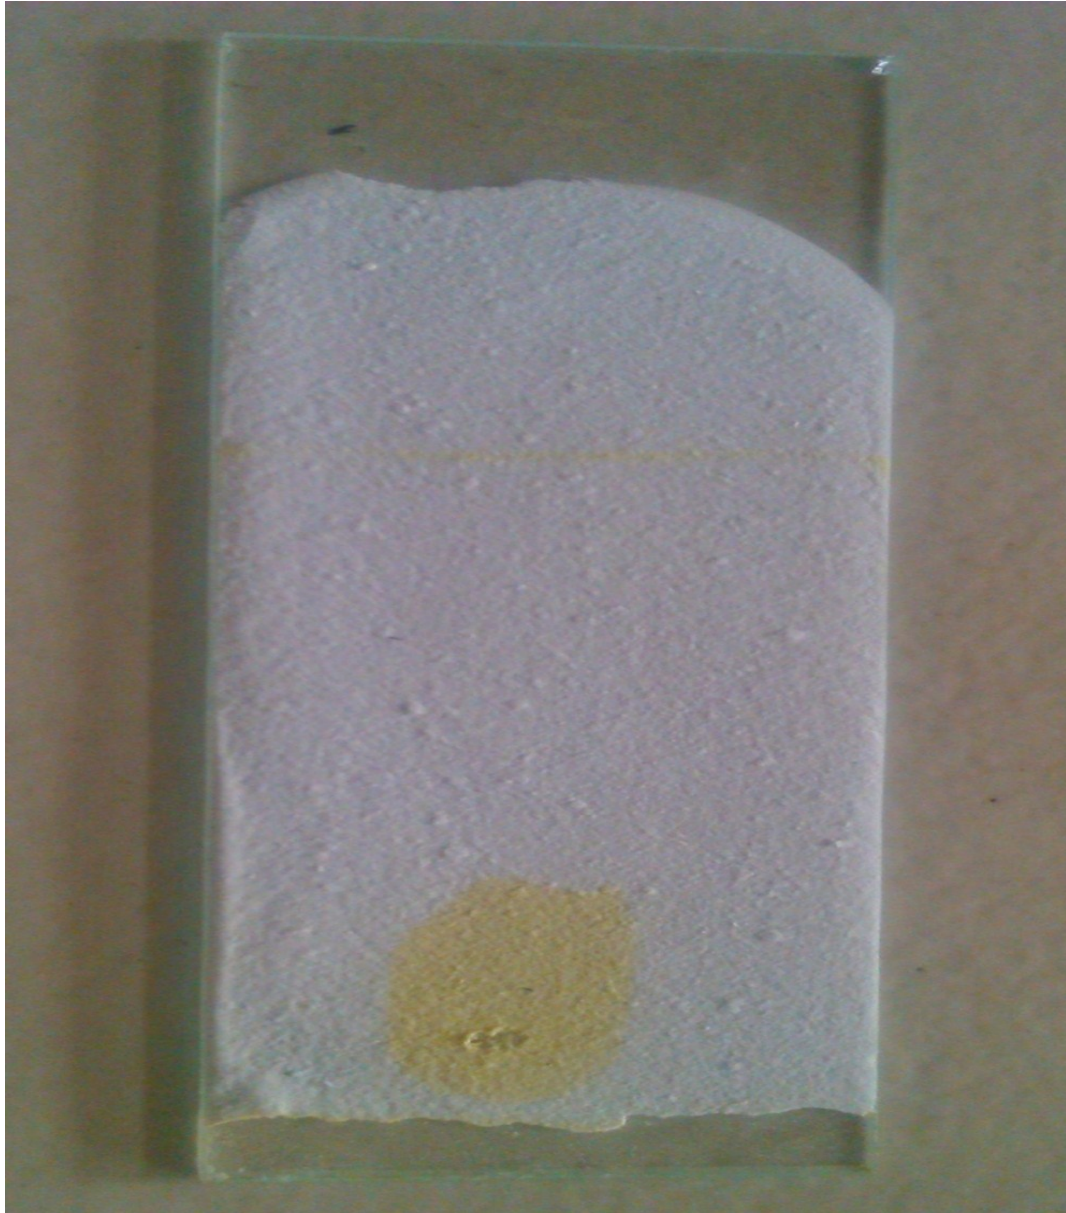

Fig. 4

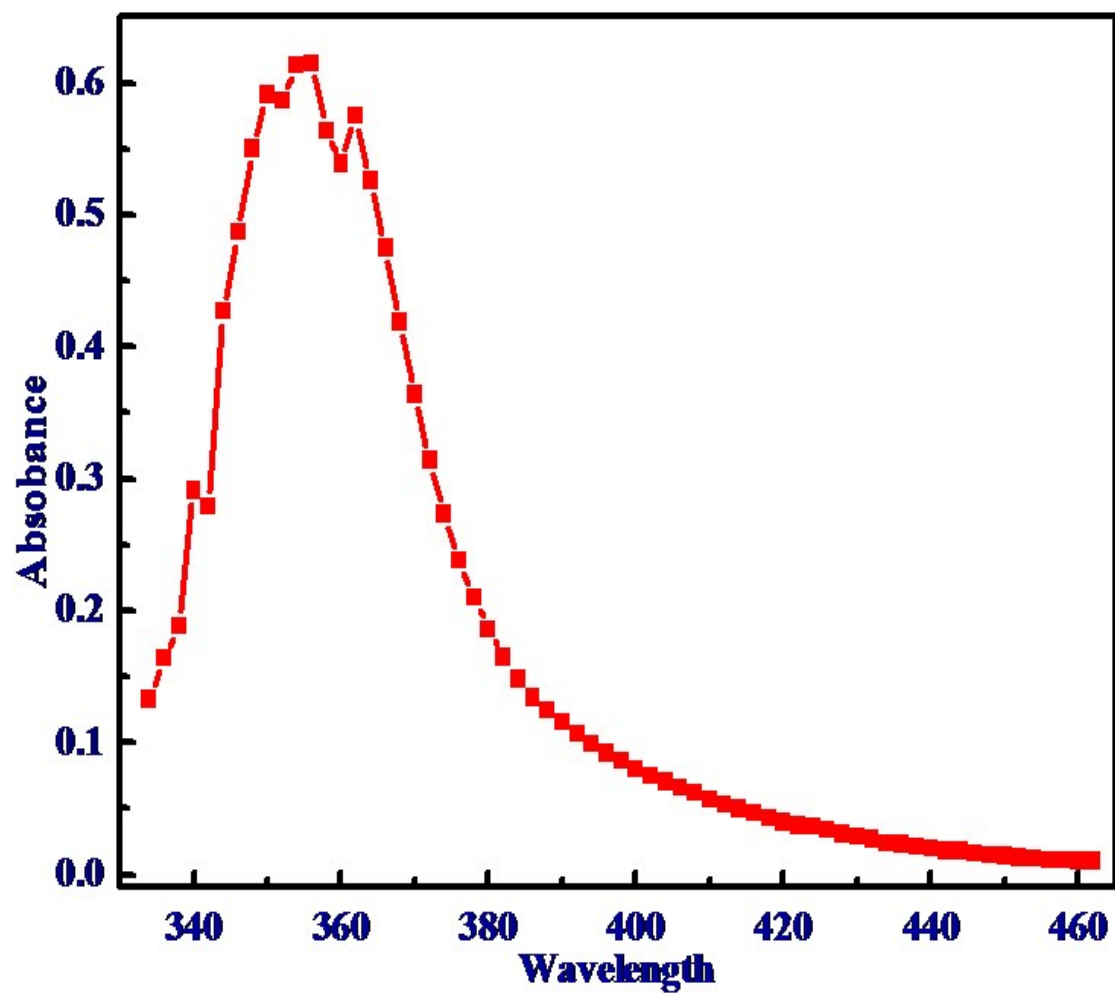

Fig 5.

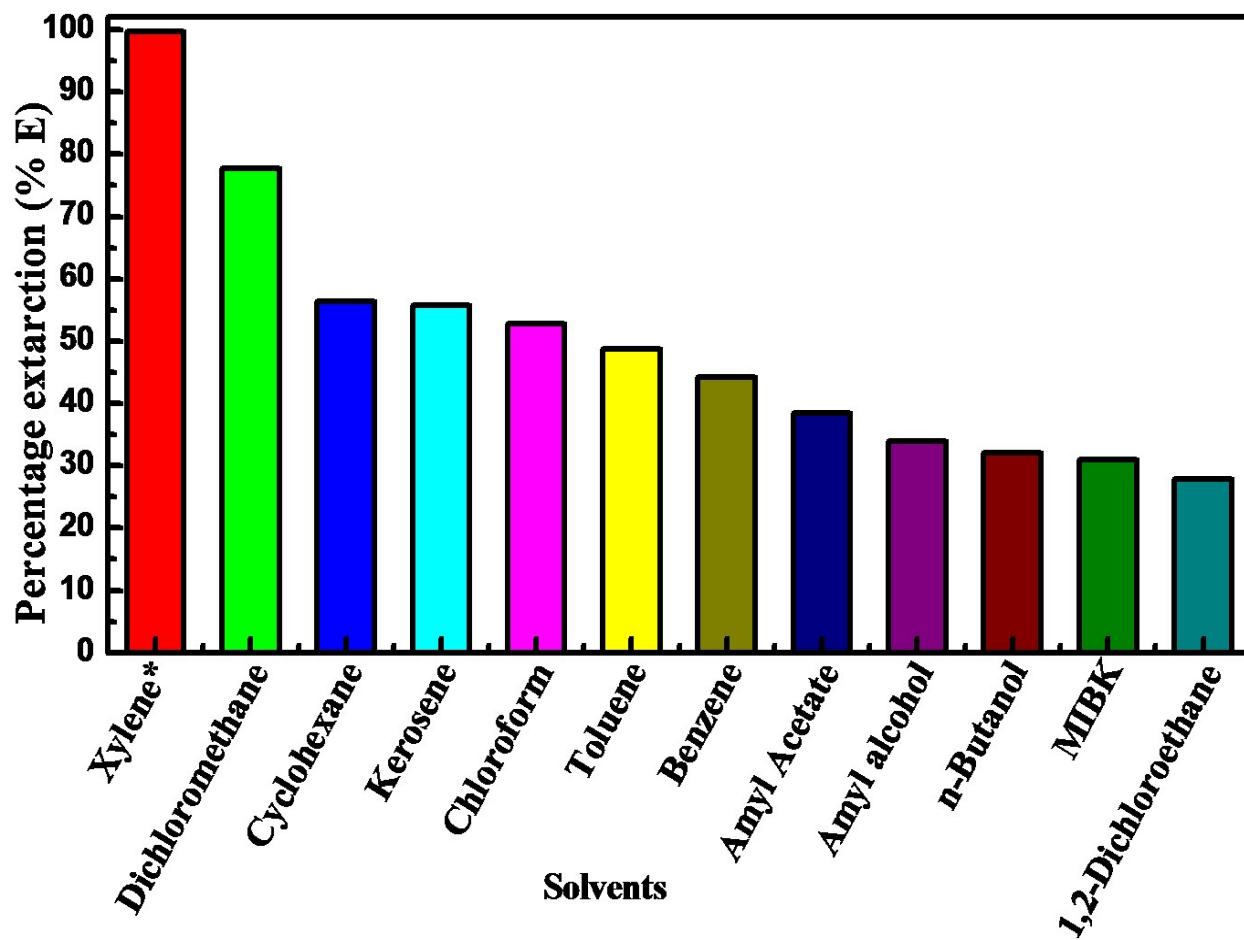

Supplement: c6ay00887a1.pdf [file c6ay00887a1.pdf]
